# Supplementary material for: Intracranial aneurysm wall enhancement as an indicator of instability: a systematic review and meta‐analysis
Source: PubMed Central journal article supplement — Eur J Neurol. 2021 Aug 25;28(11):3837–48. doi: 10.1111/ene.15046 (PMC9292155; doi:10.1111/ene.15046), 2021-08-25
Supplement: ENE-28-3837-s001.pdf [file ENE-28-3837-s001.pdf]

---

# SUPPLEMENTAL MATERIAL

## **INTRACRANIAL ANEURYSM WALL ENHANCEMENT AS AN INDICATOR OF INSTABILITY: SYSTEMATIC REVIEW AND META-ANALYSIS**

Rob Molenberg, BSc

Marlien W. Aalbers, MD PhD

Auke P.A. Appelman, MD PhD

Maarten Uyttenboogaart, MD PhD

J. Marc C. van Dijk, MD PhD

### **CONTENTS**

Table S1 Search strategy

Table S2 The different definitions of growing and symptomatic aneurysms

Table S3 MINORS quality assessment

Table S4 Subgroup meta-analysis of cross-sectional studies with growth or symptomatic presentation as outcome

Table S5 Performance of different qualitative and quantitative AWE definitions

**TABLE S1. SEARCH STRATEGY**

|                                                                                                                                                                                                                                                                                                                                                                                                                                                                                                                                                                                                                                                                                                                                        |
|----------------------------------------------------------------------------------------------------------------------------------------------------------------------------------------------------------------------------------------------------------------------------------------------------------------------------------------------------------------------------------------------------------------------------------------------------------------------------------------------------------------------------------------------------------------------------------------------------------------------------------------------------------------------------------------------------------------------------------------|
| PubMed search strategy                                                                                                                                                                                                                                                                                                                                                                                                                                                                                                                                                                                                                                                                                                                 |
| ("Intracranial Aneurysm"[Mesh] OR (aneurysm*[tiab] AND (intracranial[tiab] OR cerebral[tiab] OR berry[tiab] OR brain[tiab] OR cranial[tiab] OR intracerebral[tiab])))<br>AND<br>(Magnetic resonance imaging [Mesh] OR magnetic resonance [tiab] OR MR [tiab] OR MRI [tiab] OR MRA [tiab])<br>AND<br>(image enhancement [Mesh:noExp] OR enhanc* [tiab] OR gadolinium [tiab] OR vessel wall* [tiab] OR contrast [tiab])<br>AND<br>("Subarachnoid Hemorrhage"[Mesh] OR "Aneurysm, Ruptured"[Mesh] OR "Disease Progression"[Mesh] OR rupture*[tiab] OR hemorrhage[tiab] OR haemorrhage[tiab] OR sah[tiab] OR grow*[tiab] OR increase*[tiab] OR enlarge*[tiab] OR develop*[tiab] OR progress*[tiab] OR unstable [tiab] OR stability [tiab]) |
| Embase search strategy                                                                                                                                                                                                                                                                                                                                                                                                                                                                                                                                                                                                                                                                                                                 |
| ('Intracranial Aneurysm'/exp OR (aneurysm* AND (intracranial OR cerebral OR berry OR brain OR cranial OR intracerebral)):ab,ti)<br>AND<br>('nuclear magnetic resonance imaging'/de OR ('magnetic resonance' OR MR OR MRI OR MRA):ab,ti)<br>AND<br>('contrast enhancement'/de OR 'image enhancement'/exp OR (enhanc* OR gadolinium OR 'vessel wall*' OR contrast):ab,ti)<br>AND<br>('subarachnoid hemorrhage'/exp OR 'aneurysm rupture'/exp OR 'disease exacerbation'/exp OR (rupture* OR hemorrhage OR haemorrhage OR sah OR grow* OR increase* OR enlarge* OR develop* OR progress* OR stability OR unstable):ab,ti)<br>NOT<br>('conference abstract'/it)                                                                             |

**TABLE S2. THE DIFFERENT DEFINITIONS OF GROWING AND SYMPTOMATIC ANEURYSMS**

| Study             | Definition of growth                                                                                                                                                                                                                                                                                                                                                         | Definition of symptomatic                                                                                                                                                                                                                                                                                                                                                                                                                                              |
|-------------------|------------------------------------------------------------------------------------------------------------------------------------------------------------------------------------------------------------------------------------------------------------------------------------------------------------------------------------------------------------------------------|------------------------------------------------------------------------------------------------------------------------------------------------------------------------------------------------------------------------------------------------------------------------------------------------------------------------------------------------------------------------------------------------------------------------------------------------------------------------|
| Edjlali (2018)    | "In case of morphologic change (emergence of a bleb, irregularities of the pouch) or noted growth in aneurysm size"                                                                                                                                                                                                                                                          | "When aneurysmal cranial nerve compression was manifest or when patients presented with thunderclap headaches but no subarachnoid haemorrhage after exclusion of differential diagnosis"                                                                                                                                                                                                                                                                               |
| Matsushige (2019) | "Aneurysmal growth was defined as enlargement by >1 mm or obvious morphological change. The pattern of morphological change was classified as follows: stable (defined as no morphological changes), whole sac expansion (defined as enlargement of the whole aneurysm sac), and daughter sac formation (defined as development of a bleb or another aneurysmal component)." | N/A                                                                                                                                                                                                                                                                                                                                                                                                                                                                    |
| Fu (2021)         | N/A                                                                                                                                                                                                                                                                                                                                                                          | "(i) with sentinel headache (development of a sudden and severe headache on the ipsilateral side of the aneurysms within 2 weeks of admission without prior history of headache within the previous 5 years) <sup>2,17</sup> or (ii) with oculomotor nerve palsy (a sudden headache with one or several symptoms of pupillary light reflex disappearing, ptosis, or extraocular myoparalysis on the ipsilateral side of the aneurysm within 1 month before admission)" |
| Wang (2019)       | N/A                                                                                                                                                                                                                                                                                                                                                                          | "patients with neurologic symptoms (e.g., sudden headache or blepharoptosis) related to the location of the aneurysm"                                                                                                                                                                                                                                                                                                                                                  |
| Zhu (2020)        | N/A                                                                                                                                                                                                                                                                                                                                                                          | "(1) cranial nerve deficits associated with UIA (e.g., abrupt unilateral visual loss, diplopia, retrobulbar pain, pupillary light reflex disappearing, ptosis, extraocular myoparalysis, or trigeminal pain); (2) acute headache: sudden, intense headache at onset with resolution in the following 72 h; (3) chronic headache: chronic and recurrent headache with a marked improvement after surgical intervention of the aneurysm."                                |
| Zhong (2020)      | N/A                                                                                                                                                                                                                                                                                                                                                                          | "An aneurysm was considered symptomatic when aneurysmal cranial nerve deficits were present or when patients presented with emerging headaches, but no subarachnoid hemorrhage, after exclusion of differential diagnoses."                                                                                                                                                                                                                                            |
| Omodaka (2019)    | "1) maximum aneurysm diameter increase by 2 mm or more, 2) appearance of bleb, or 3) de novo aneurysm formation."                                                                                                                                                                                                                                                            | "Symptomatic (neurological deficit) at the time MR vessel wall imaging was acquired. General headache was not considered as a symptom."                                                                                                                                                                                                                                                                                                                                |
| Vergouwen (2019)  | "growth of $\geq 1$ mm in at least 1 direction."                                                                                                                                                                                                                                                                                                                             | N/A                                                                                                                                                                                                                                                                                                                                                                                                                                                                    |
| Gariel (2020)     | "a measurable increase in size $\geq 1$ mm of maximal aneurysm diameter or by appearance of irregularity on the aneurysmal pouch, on coregistered maximal intensity projections."                                                                                                                                                                                            | N/A                                                                                                                                                                                                                                                                                                                                                                                                                                                                    |

N/A = Not applicable

**TABLE S3. MINORS QUALITY ASSESSMENT**

| Item                                                 | Matsushige (2019) | Edjlali (2018) | Omodaka (2016) | Wang (2018) | Nagahata (2016) | Gariel (2020) | Vergouwen (2019) | Omodaka (2019) | Fu (2021) | Wang (2019) | Zhu (2020) | Zhong (2020) |
|------------------------------------------------------|-------------------|----------------|----------------|-------------|-----------------|---------------|------------------|----------------|-----------|-------------|------------|--------------|
| A clearly stated aim                                 | 2                 | 2              | 2              | 2           | 2               | 2             | 2                | 2              | 2         | 2           | 2          | 2            |
| Inclusion of consecutive patients                    | 2                 | 2              | 2              | 2           | 2               | 2             | 2                | 2              | 2         | 2           | 2          | 2            |
| Prospective collection of data                       | 1                 | 2              | 0              | 1           | 1               | 2             | 2                | 1              | 2         | 1           | 1          | 2            |
| Endpoints appropriate to the aim of the study        | 2                 | 2              | 2              | 2           | 2               | 2             | 2                | 2              | 2         | 2           | 2          | 2            |
| Unbiased assessment of the study endpoint            | 1                 | 2              | 2              | 1           | 2               | 1             | 2                | 1              | 2         | 2           | 2          | 1            |
| Follow-up period appropriate to the aim of the study | N/A               | N/A            | N/A            | N/A         | N/A             | 2             | 1                | N/A            | N/A       | N/A         | N/A        | N/A          |
| Loss to follow-up less than 5%                       | N/A               | N/A            | N/A            | N/A         | N/A             | 0             | 2                | N/A            | N/A       | N/A         | N/A        | N/A          |
| Prospective calculation of the study size            | 0                 | 0              | 0              | 0           | 0               | 0             | 0                | 0              | 0         | 0           | 0          | 0            |
| An adequate control group                            | 2                 | 2              | 2              | 2           | 2               | N/A           | N/A              | 2              | 2         | 2           | 2          | 2            |
| Contemporary groups                                  | 2                 | 2              | 2              | 2           | 2               | N/A           | N/A              | 2              | 2         | 2           | 2          | 2            |
| Baseline equivalence of groups                       | 2                 | 2              | 2              | 2           | 2               | N/A           | N/A              | 2              | 2         | 2           | 2          | 0            |
| Adequate statistical analysis                        | 0                 | 2              | 2              | 2           | 1               | 2             | 2                | 2              | 2         | 2           | 2          | 2            |
| Total points                                         | 14                | 18             | 16             | 16          | 16              | 13            | 15               | 16             | 18        | 17          | 17         | 15           |

*We scored items from 0 to 2. A score of 0 reflects an unreported item. A score of 1 reflects an item that is reported but inadequate. A score of 2 reflects an item that is reported and adequate. The maximum obtainable score is 20 for cross-sectional studies and 18 for longitudinal studies, taking 'N/A'-items into account. N/A = not applicable.*

**TABLE S4. SUBGROUP META-ANALYSIS OF CROSS-SECTIONAL STUDIES WITH GROWTH OR SYMPTOMATIC PRESENTATION AS OUTCOME**

| Variable          | Subgroup               | No. of studies | PR (95% CI)       | I <sup>2</sup> | P-value heterogeneity |
|-------------------|------------------------|----------------|-------------------|----------------|-----------------------|
| AWE Assessment    | Qualitative            | 6              | 4.40 (2.60-7.45)  | 67%            | 0.01                  |
|                   | Quantitative           | 1              | 7.20 (2.32-22.37) | n/a            | n/a                   |
| Aneurysm size     | < 7mm                  | 5              | 3.85 (2.46-6.02)  | 56%            | 0.06                  |
|                   | ≥ 7mm                  | 2              | 9.88 (4.39-22.26) | 0%             | 0.48                  |
| Geographic region | Japan                  | 2              | 3.65 (0.92-14.38) | 80%            | 0.03                  |
|                   | Other                  | 5              | 5.17 (3.50-7.65)  | 23%            | 0.27                  |
| Outcome           | Growth                 | 2              | 3.65 (0.92-14.38) | 80%            | 0.03                  |
|                   | Symptomatic            | 4              | 5.76 (3.74-8.86)  | 20%            | 0.29                  |
|                   | Growth and symptomatic | 1              | 3.42 (1.63-7.18)  | n/a            | n/a                   |

*n/a = not applicable.*

**TABLE S5. PERFORMANCE OF DIFFERENT QUALITATIVE AND QUANTITATIVE AWE DEFINITIONS**

| Study           | Outcome              | AWE definition                                                                                    | AUC                 | Sensitivity (%)  | Specificity (%)  | PPV (%) | NPV (%) | Reproducibility           |                  |
|-----------------|----------------------|---------------------------------------------------------------------------------------------------|---------------------|------------------|------------------|---------|---------|---------------------------|------------------|
|                 |                      |                                                                                                   |                     |                  |                  |         |         | Inter-rater               | Intra-rater      |
| Edjlali (2018)  | Growth Symptomatic + | CAWE, grade 2 and grade 3*                                                                        | 0.677               | 64.5 (47.6-81.3) | 68.1 (62.6-73.6) | 18.5    | 94.4    | Grade 2: 0.87 (0.80-0.92) | NR               |
|                 |                      | Grade 3                                                                                           | 0.762               | 61.3 (44.1-78.4) | 84.4 (80.1-88.7) | 28.3    | 94.3    | 0.88 (0.81-0.92)          | NR               |
| Omodaka (2016)  | Rupture              | WEI (cutoff value of 0.53)                                                                        | 0.75                | 96               | 47               | NR      | NR      | 0.92 (0.81-0.97)          | 0.94 (0.86-0.98) |
| Wang (2018)     | Rupture              | Enhancement Ratio (threshold of 61.5%)                                                            | 0.798 (0.703-0.893) | 89.5             | 63.2             | NR      | NR      | NR                        | NR               |
| Nagahata (2016) | Rupture              | Faint enhancement†                                                                                | NR                  | 98.4             | 81.9             | NR      | NR      | NR                        | NR               |
|                 |                      | Strong enhancement†                                                                               | NR                  | 73.8             | 95.2             | NR      | NR      | NR                        | NR               |
| Fu (2021)       | Symptomatic          | AWE pattern (0, no; 1, focal; 2, circumferential)                                                 | 0.79                | NR               | NR               | NR      | NR      | 0.87 (0.83-0.92)          | NR               |
|                 |                      | WEI (cutoff value of 0.56)                                                                        | 0.78                | NR               | NR               | NR      | NR      | ICC=0.98 (0.97-0.98)      | NR               |
|                 |                      | AWE pattern + WEI                                                                                 | 0.91                | 95.7             | 73.4             | NR      | NR      | N/A                       | N/A              |
| Wang (2019)     | Symptomatic          | Enhancement Ratio (threshold of 60.5%)                                                            | 0.903 (0.836-0.970) | 90.3             | 87.9             | NR      | NR      | NR                        | NR               |
| Zhu (2020)      | Symptomatic          | AWE area (0, none; 1, focal less than 50%; 2, incomplete between 50-99%; 3, complete enhancement) | 0.888               | 72.2             | 92.0             | NR      | NR      | 0.88                      | NR               |
| Edjlali (2020)  | Growth               | Increased AWE during follow-up                                                                    | NR                  | 67               | 100              | 96      | 100     | 0.87 (0.72-1.0)           | NR               |

*This table includes the performance of other AWE definitions than the qualitative definition of ‘presence’ vs ‘absence’ of AWE. Data between parentheses are 95% CIs. \*grade 2 is thin circumferential enhancement and grade 3 is thick (>1mm) circumferential enhancement. †‘strong’ is definite enhancement equal to choroid plexus or venous plexus and ‘faint’ is increased wall signal intensity compared to precontrast scan. CAWE = circumferential arterial wall enhancement. PPV = positive predictive value. NPV = negative predictive value. NR = not reported. WEI = Wall Enhancement Index. AUC = Area under the curve. ICC = intraclass correlation coefficient. N/A = Not applicable.*
